# Supplementary material for: Acid-sensitive PEG-removable nanoscale liposomes for delivery of doxorubicin in A549/ADR therapy
Source: Royal Society of Chemistry journal article supplement (doi:10.1039/d3nj01764h), 2023-01-01
Supplement: d3nj01764h1.pdf [file d3nj01764h1.pdf]

## Supporting Information

### Acid-Sensitive PEG-Removable Nanoscale Liposomes for Delivery of Doxorubicin in A549/ADR Therapy

Hailiang Chen, Chenyu Liu\*, Simiao Yu, Hengjun Zhou, Farishta Shafiq, Weihong Qiao\*

State Key Laboratory of Fine Chemicals, School of Chemical Engineering, Dalian University of Technology, Dalian 116024, P. R. China

#### 1. Synthesis of mPEG-N=CH-DOB and mPEG-NH-CO-DOB

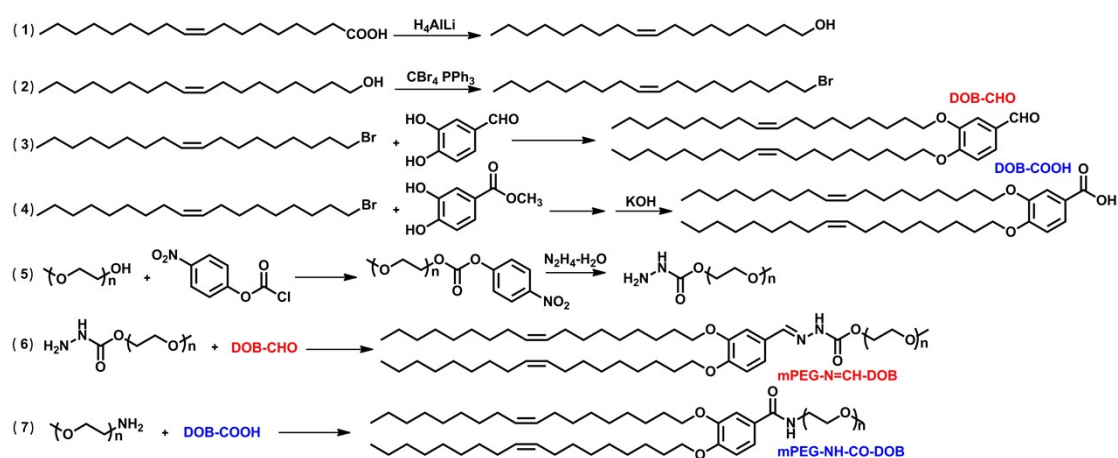

**Fig. S1.** Synthetic route of mPEG-N=CH-DOB and mPEG-NH-CO-DOB.

(1) Add 10 g of oleic acid and 120 mL of anhydrous ethyl ether to a 250 mL flask and stir well. Add 45 mL of anhydrous tetrahydrofuran solution of 3.36 g lithium aluminum hydride to the oleic acid in batches under ice bath conditions. Raise the temperature to 60°C, reflux the reaction for 4 h. Cool the reaction and quench the reaction by adding wet ether. The reaction solution was hydrolyzed by adding 2 mol/L

hydrochloric acid, centrifuged, partitioned, the organic phase was collected, dried by adding anhydrous  $\text{Na}_2\text{SO}_4$ , filtered, spun off and dried under vacuum to obtain 7.73 g (yield 81%) of the product **oleyl alcohol** as a colorless viscous liquid and was confirmed by GC-MS, and the purity was 98.72 %.

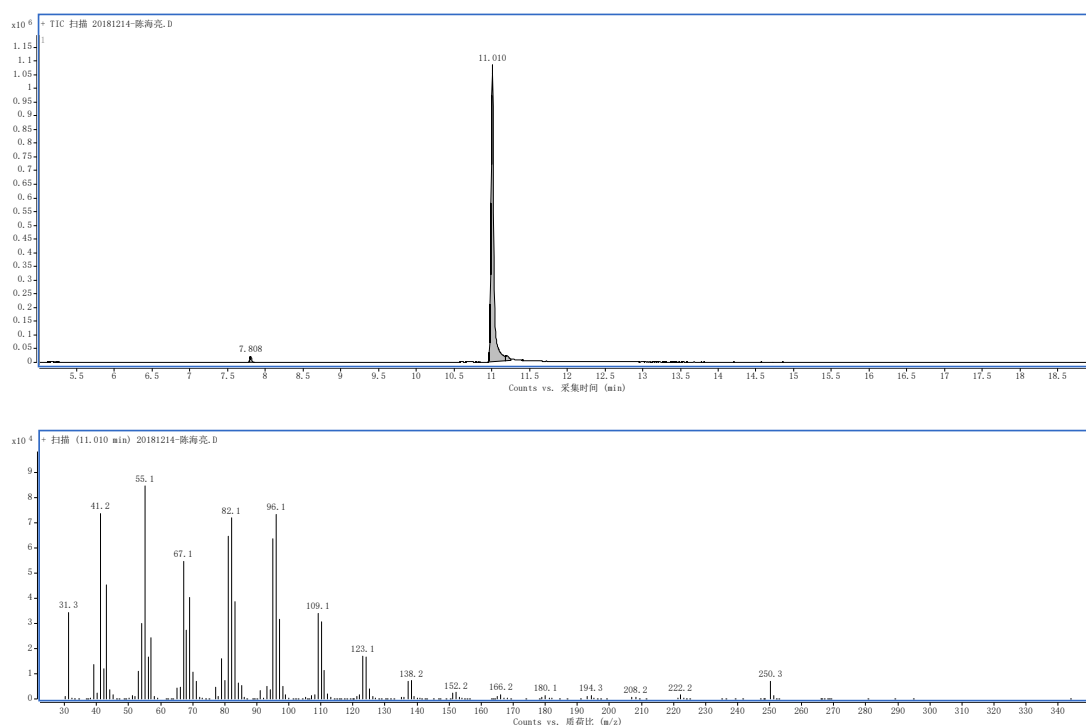

**Fig. S2.** GC-MS of Oleyl alcohol.

(2) Dissolve 7.73 g of oleyl alcohol in 144 mL of dichloromethane in an ice water bath, add 12.42 g of  $\text{CBr}_4$  and  $\text{PPh}_3$  in batches and stir for 40 min. Dilute with hexane, filter, spin and repeat until no precipitation, dry under vacuum to obtain 8.78 g of product (**Z**)-**1-bromooctadec-9-ene** (yield 92%) as a colorless viscous liquid and was confirmed by GC-MS, and the purity was 99.13%.

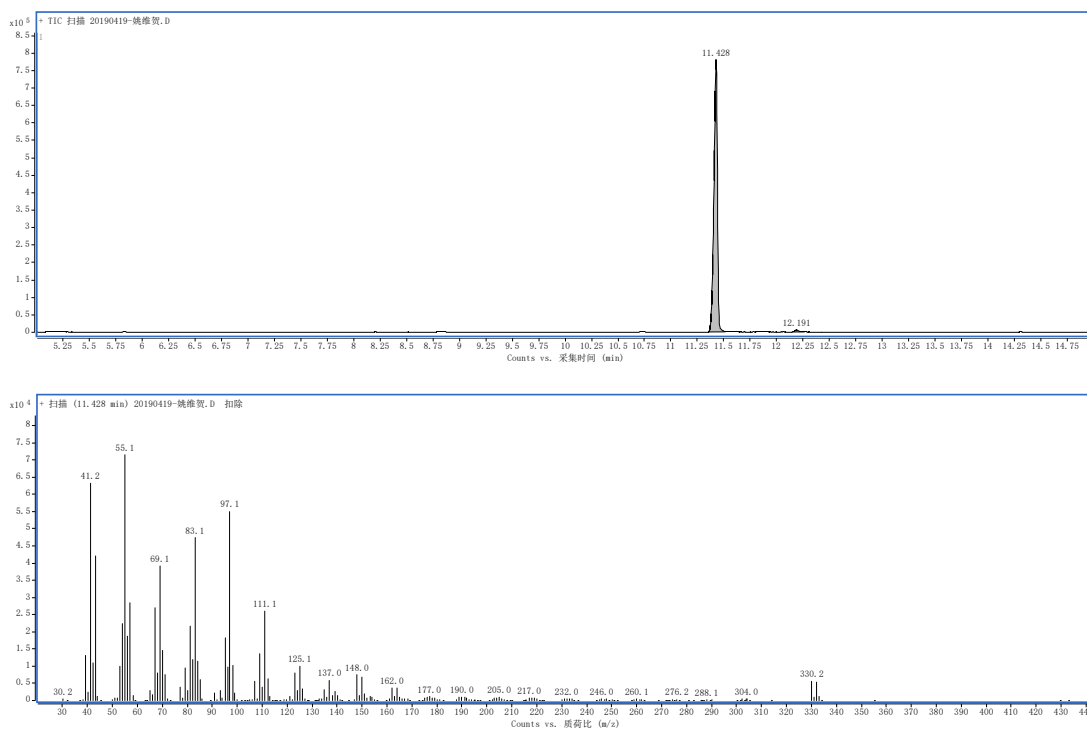

**Fig. S3.** GC-MS of (Z)-1-bromooctadec-9-ene.

(3) 4.17 g (Z)-1-bromo-octadec-9-ene was dissolved in 25 mL cyclohexanone, added 0.80 g 3,4-dihydroxybenzaldehyde, 2.39 g  $K_2CO_3$ , 0.12 g KI, protected from light and  $N_2$ , and reacted at  $100^\circ C$  for 18 h. The residue was dissolved in dichloromethane, washed twice with water, collected the organic phase, dried with anhydrous  $Na_2SO_4$ , filtered, and purified by column chromatography with petroleum ether/ethyl acetate, dried under vacuum, and obtained 1.70 g **DOB-CHO** (yield 46.2%) as a yellow solid and confirmed by  $^1H$  NMR.  $^1H$  NMR (500MHz,  $CDCl_3$ ):  $\delta = 9.83$  (s, 1H,  $-C(O)H$ ), 7.41 (m, 2H,  $H_{ar}$  o-C(O)), 6.95 (d, 1H,  $H_{ar}$  m-C(O)), 5.35 (s, 4H,  $=CH-$ ), 4.06 (m, 4H, O- $CH_2$ ), 2.02 (s, 8H,  $-CH_2-CH=$ ), 1.85 (d, 4H,  $-CH_2-CH_2$  -O-ph), 1.60-1.10 (m, 44H, alkyl- $CH_2$ ), 0.88 (t, 6H,  $-CH_3$ ).

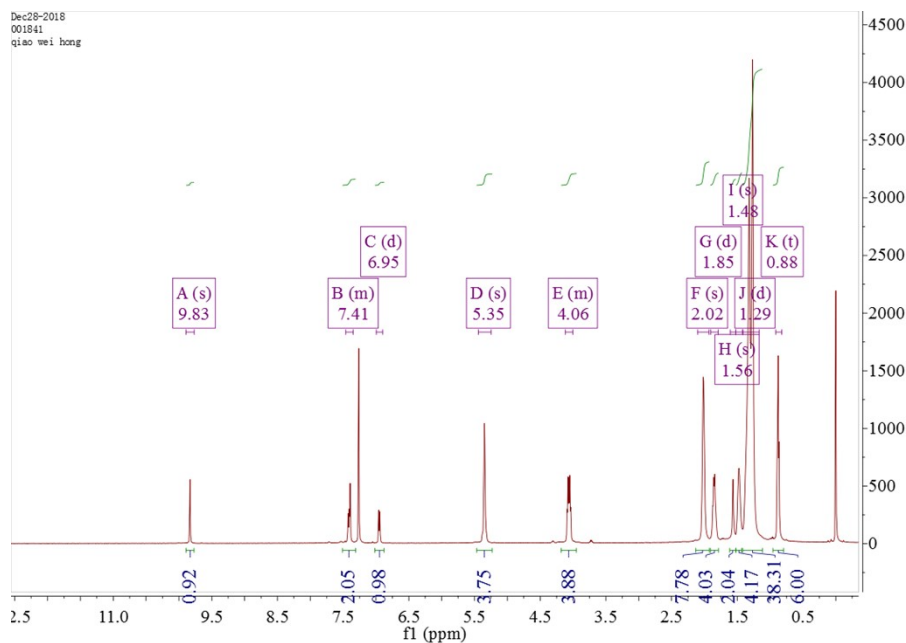

**Fig. S4.**  $^1\text{H-NMR}$  spectra of DOB-CHO.

(4) Dissolve 3.51 g (Z)-1-bromo-octadec-9-ene in 25 mL cyclohexanone, add 0.82 g methyl 3,4-dihydroxybenzoate, 2 g  $\text{K}_2\text{CO}_3$ , 0.98 g KI, protect from light,  $\text{N}_2$ , and react at  $100^\circ\text{C}$  for 18 h. Filter while hot, spin evaporate, and dissolve the residue in 2.20 g KOH in 82.50 mL ethanol solution, reflux at  $80^\circ\text{C}$  for 4 h. Add the reaction solution to 640 mL water, precipitate a white solid, filter, wash twice with water, recrystallized with ethanol, filter and vacuum dry to obtain 1.67 g DOB-COOH (yield 52%) as a white solid and confirmed by MS and  $^1\text{H NMR}$ . MS:  $M=654.56$ ;  $m/z=653.68$  is  $[\text{M-H}]^-$ .  $^1\text{H NMR}$  (500MHz,  $\text{CDCl}_3$ ):  $\delta = 7.72$  (d, 1H,  $\text{H}_{\text{ar}}$  o-C(O), m-OR, p-OR), 7.58 (s, 1H,  $\text{H}_{\text{ar}}$  o-C(O), o-OR, m-OR), 6.88 (t, 1H,  $\text{H}_{\text{ar}}$  m-C(O)), 5.35 (m, 4H, =CH-), 4.05 (dd, 4H, O- $\text{CH}_2$ ), 2.02 (d, 8H, - $\text{CH}_2$ -CH=), 1.84 (m, 4H, - $\text{CH}_2$ - $\text{CH}_2$ -O-ph), 1.53-1.15 (m, 44H, alkyl- $\text{CH}_2$ ), 0.88 (t, 6H, - $\text{CH}_3$ ).

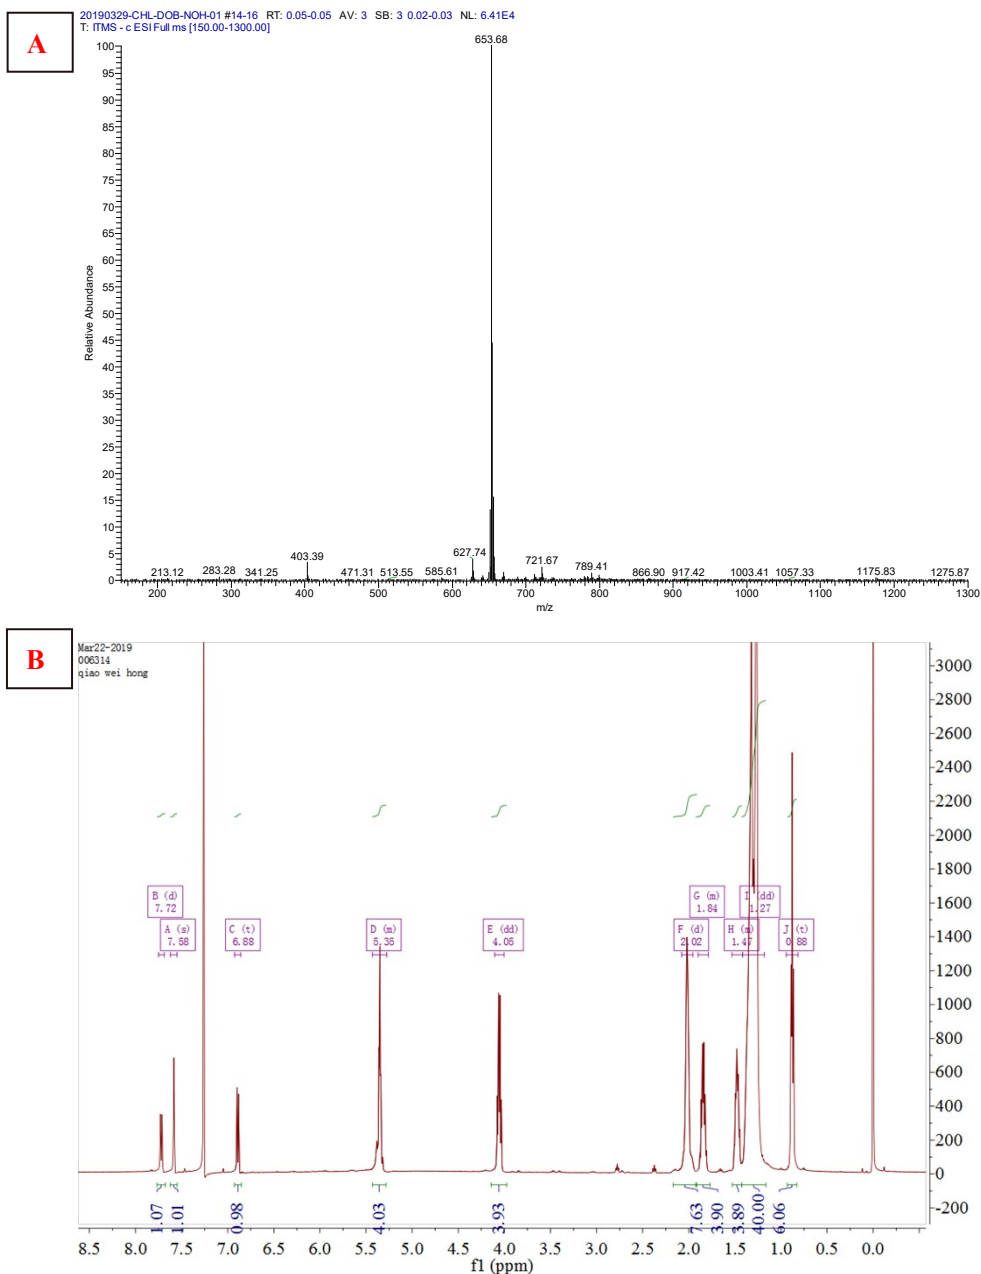

**Fig. S5.** MS (A) and  $^1\text{H}$ -NMR spectra (B) of DOB-COOH.

(5) 4 g (2 mmol) PEG<sub>2000</sub> monomethyl ether was dissolved in 40 mL dichloromethane. The dichloromethane solution of 48.9 mg (0.4 mmol) DMAP, 0.89 g (4.4 mmol) 4-nitrophenyl chloroformate (NPCF) was added to the reaction flask in turn, and the reaction was carried out at 35°C for 24 h under the protection of N<sub>2</sub>. The residue was dissolved in ethyl acetate, added with an equal amount of ether, stood overnight at

4°C, filtered, and dried in vacuum to give a white solid **mPEG-NPCF** of 3.90 g (yield 90%) and confirmed by <sup>1</sup>H NMR. <sup>1</sup>H NMR (500MHz, CDCl<sub>3</sub>): δ=8.28 (m, 2H, H<sub>ar</sub> o-NO<sub>2</sub>), 7.39 (m, 2H, H<sub>ar</sub> m-NO<sub>2</sub>), 4.43 (m, 2H, -CH<sub>2</sub>-O-C(O)-), 3.60-3.66 (m, main peak: 3.65, 188H, -O-CH<sub>2</sub>), 3.37 (s, 3H, -CH<sub>3</sub>).

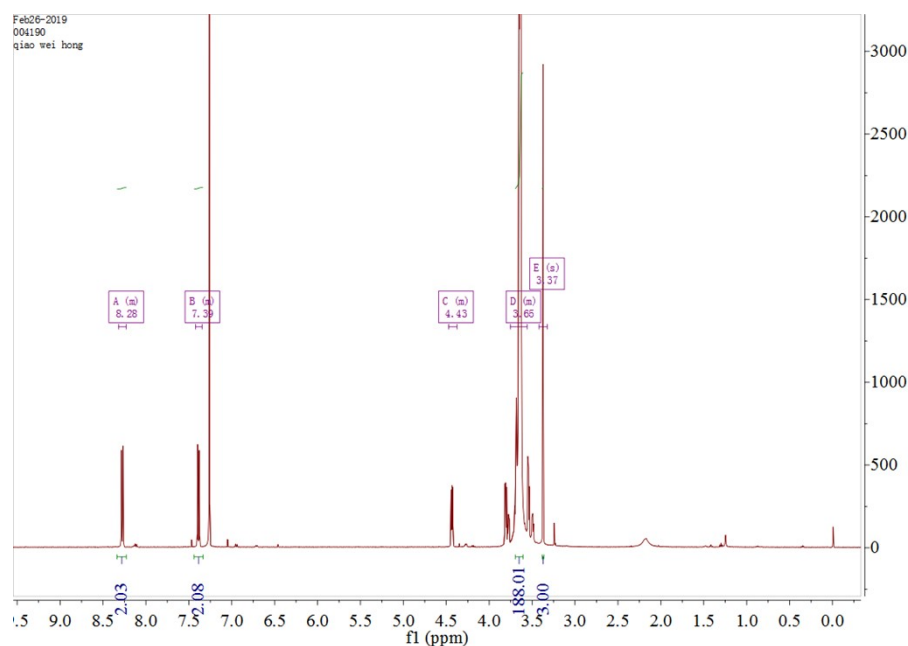

**Fig. S6.** <sup>1</sup>H-NMR spectra of mPEG-NPCF.

3.90 g (1.95 mmol) mPEG-NPCF and 1 g (20 mmol) hydrazine hydrate were dissolved in 10 mL anhydrous dichloromethane at room temperature under N<sub>2</sub> protection for 24 h. 1M hydrochloric acid, saturated NaCl, water washed 2 times, anhydrous Na<sub>2</sub>SO<sub>4</sub> dry, rotary evaporation. Dissolve the residue with ethyl acetate, add the same amount of ether, 4°C overnight, filter, vacuum drying, get the product **mPEG-NH-NH<sub>2</sub>** 3.50 g (yield 85%), white solid and confirmed by <sup>1</sup>H NMR. <sup>1</sup>H NMR (500MHz, CDCl<sub>3</sub>): δ=3.63-3.70(d, main peak: 3.64, 180H, -O-CH<sub>2</sub>), 3.38 (s, 3H, -CH<sub>3</sub>).

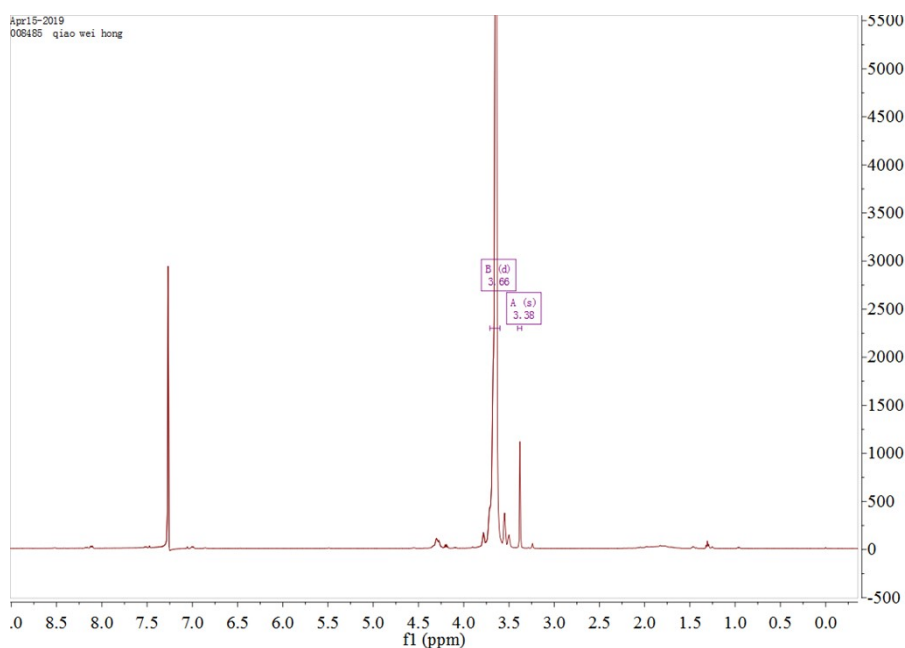

**Fig. S7.**  $^1\text{H-NMR}$  spectra of mPEG-NH-NH<sub>2</sub>.

(6) 3.50 g (1.75 mmol) mPEG-NH-NH<sub>2</sub> and 1.30 g (2 mmol) DOB-CHO were dissolved in 70 mL anhydrous dichloromethane, 35  $\mu\text{L}$  trifluoroacetic acid was added, N<sub>2</sub> protection, reflux reaction for 24 h. After the reaction, 35  $\mu\text{L}$  triethylamine was added and evaporated. The product **mPEG-N=CH-DOB** was separated and purified by gradient dichloromethane/methanol (30:1-15:1) column chromatography and vacuum drying to obtain 2.37 g (yield 52%), which was a white solid and confirmed by  $^1\text{H NMR}$  and MALDI-TOF-MS.  $^1\text{H NMR}$  (500 MHz, CDCl<sub>3</sub>):  $\delta$  = 8.50 (s, 1H, -CH=N-), 7.80 (s, 1H, H<sub>ar</sub> o-CH=N-, o-OR, m-OR), 7.03 (d, 1H, H<sub>ar</sub> o-CH=N-, m-OR, p-OR), 6.82 (d, 1H, H<sub>ar</sub> m-C(O)), 5.34 (d, 4H, =CH-), 4.27 (m, 2H, -C(O)-O-CH<sub>2</sub>-O-), 4.01 (m, 4H, -CH<sub>2</sub>-O-ph), 3.50-3.78 (s, main peak: 3.64, 180H, O-CH<sub>2</sub>), 3.38 (s, 3H, -O-CH<sub>3</sub>), 2.02 (m, 8H, -CH<sub>2</sub>-CH=CH-), 1.72 (s, 4H, -CH<sub>2</sub>-CH<sub>2</sub>-O-ph), 1.45-1.29(m, 44H, alkyl-CH<sub>2</sub>), 0.87 (t, 6H, alkyl-CH<sub>3</sub>).

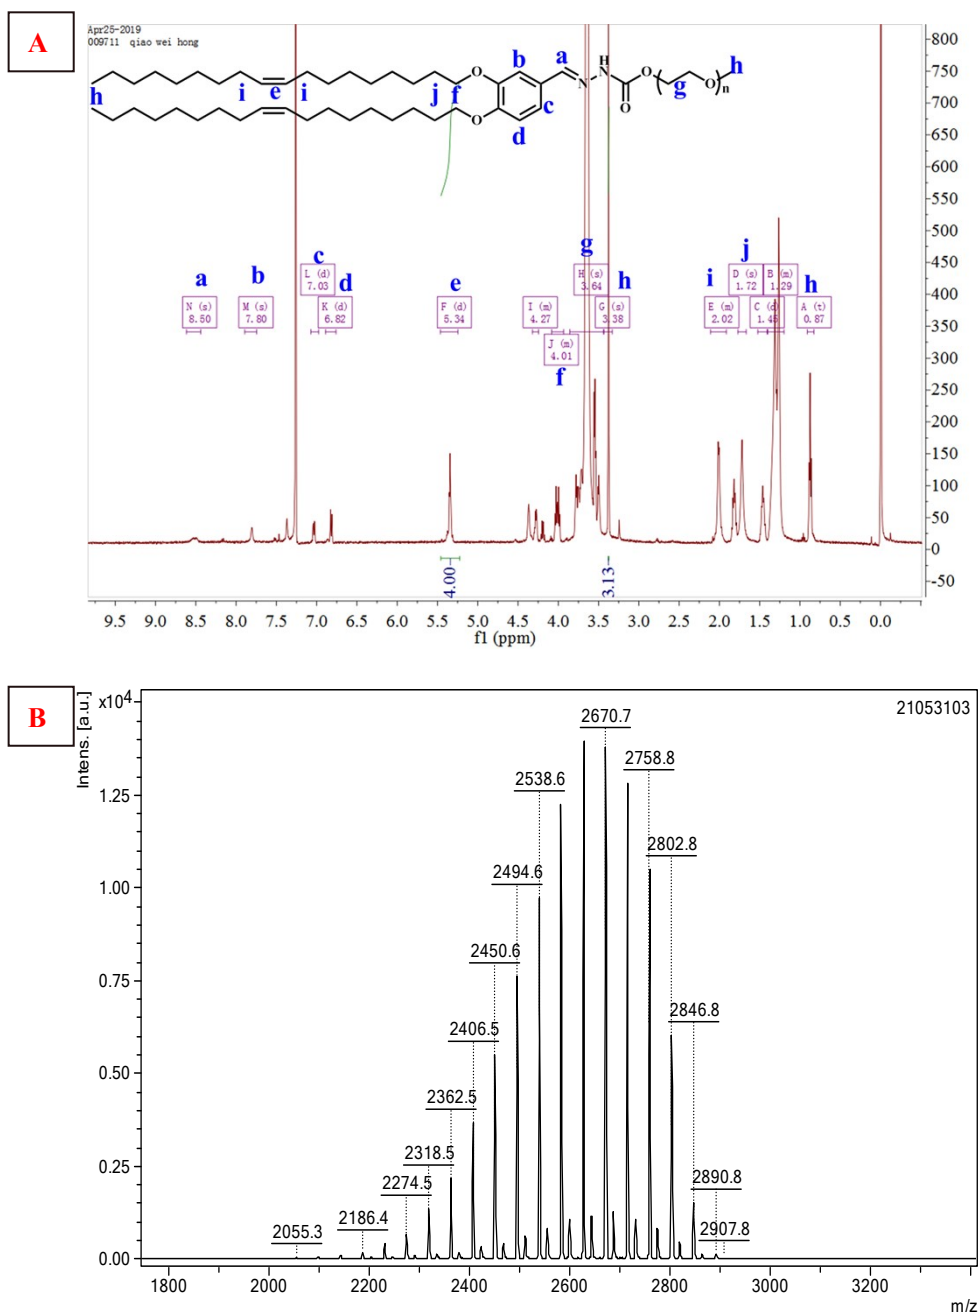

**Fig. S8.**  $^1\text{H-NMR}$  spectra(A) and MALDI-TOF-MS (B)of mPEG-N=CH-DOB.

(7) 1.11 g (1.70 mmol) DOB-COOH, 0.65 g (1.71 mmol) HBTU and 0.44 g (3.40 mmol) DIEPA were added to a round bottom flask and dissolved in 50 mL dichloromethane. After stirring at room temperature for 2 h, 2.70 g (1.35 mmol) mPEG-NH<sub>2</sub> was added, protected by N<sub>2</sub>, and stirred at room temperature for 24 h. The samples were washed twice with 0.1M hydrochloric acid, saturated NaHCO<sub>3</sub> and



saturated salt water, respectively. The organic phase was collected, dried with anhydrous  $\text{Na}_2\text{SO}_4$ , filtered, and rotary evaporated. The samples were separated and purified by silica gel column chromatography with a gradient of dichloromethane/methanol (30:1 to 6:1). The product 3.25 g (yield 90%) was white solid and confirmed by  $^1\text{H}$  NMR and MALDI-TOF-MS.  $R_f = 0.88$  (dichloromethane/methanol 6:1 v/v).  $^1\text{H}$  NMR (500MHz,  $\text{CDCl}_3$ ):  $\delta = 7.71$  (dd, 1H,  $\text{H}_{\text{ar}}$  o-C(O), o-OR, m-OR), 7.52 (dd, 1H,  $\text{H}_{\text{ar}}$  o-C(O), m-OR, p-OR), 6.84 (d, 1H,  $\text{H}_{\text{ar}}$  m-C(O)), 5.34 (m, 4H, =CH-), 4.30 (t, 4H, O- $\text{CH}_2$ - $\text{CH}_2$ -NH-); 4.02 (m, 4H, - $\text{CH}_2$ -O-ph), 3.50-3.78 (s, main peak: 3.64, 180H, O- $\text{CH}_2$ ), 3.38 (s, 3H, -O- $\text{CH}_3$ ), 2.00 (s, 8H, - $\text{CH}_2$ -CH=CH-), 1.71 (m, 4H, - $\text{CH}_2$ - $\text{CH}_2$ -O-ph), 1.44 (td, 4H, - $\text{CH}_2$ - $\text{CH}_2$ - $\text{CH}_2$ -O-ph); 1.28 (d, 44H, alkyl- $\text{CH}_2$ ), 0.87 (t, 6H, alkyl- $\text{CH}_3$ ).

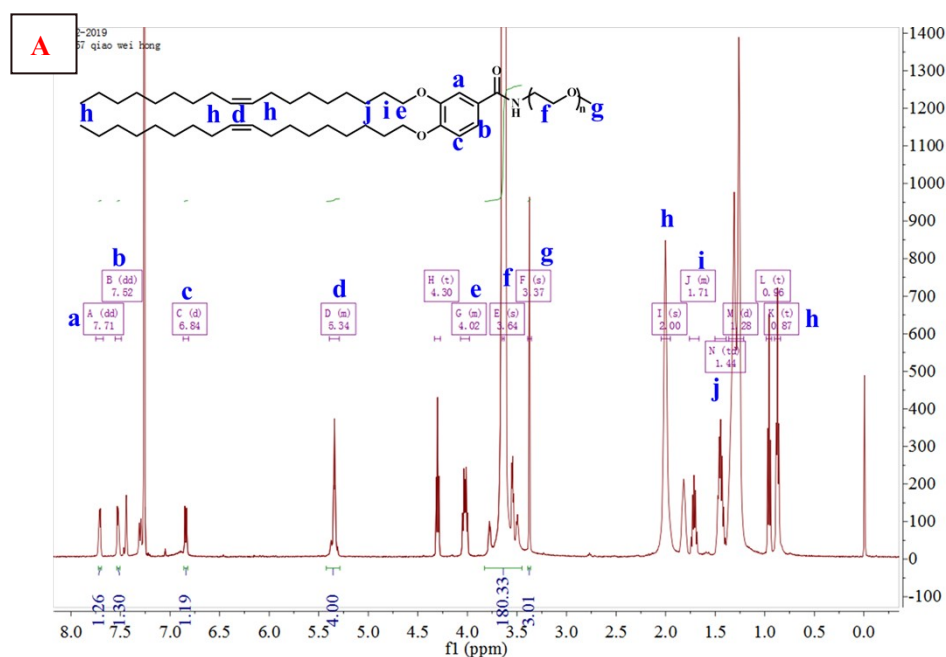

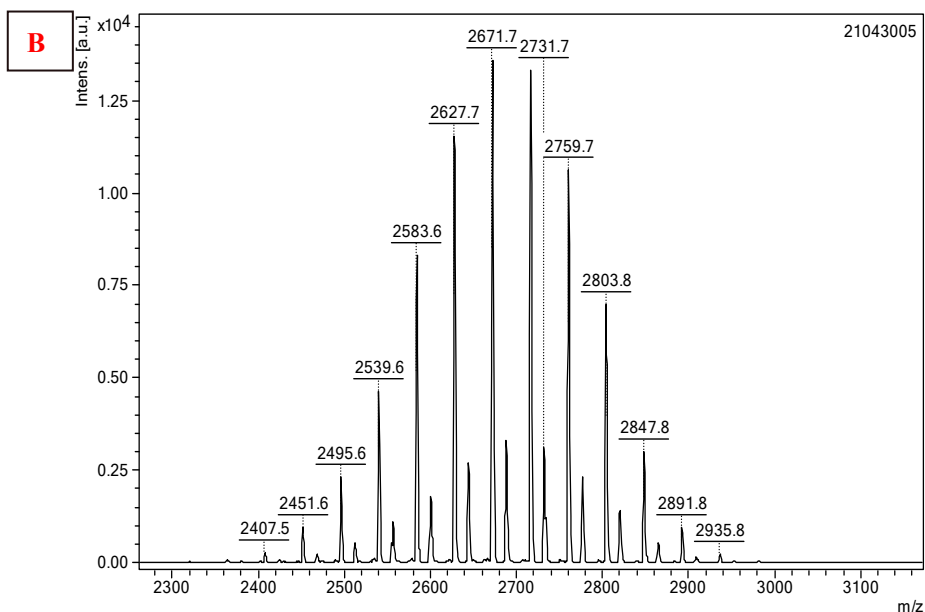

**Fig. S9.**  $^1\text{H-NMR}$  spectra (A) and MALDI-TOF-MS (B) of mPEG-NH-CO-DOB.

## 2. Experimental supplementary materials

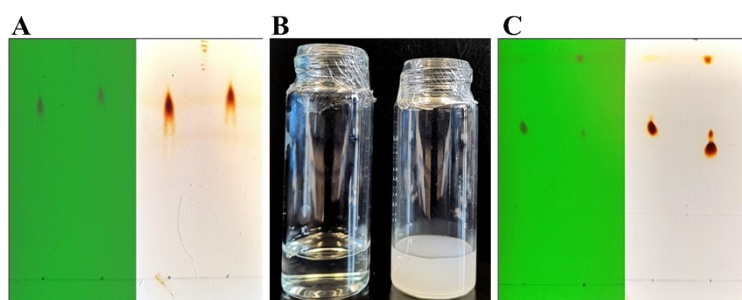

**Fig. S10.** pH fracture performance study of mPEG-N=CH-DOB.

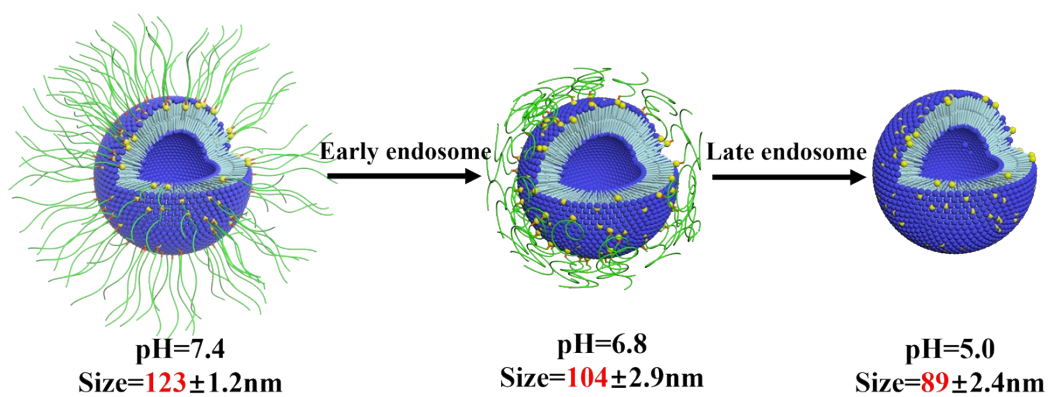

**Fig. S11.** Morphological changes of PHDG with decreasing pH.

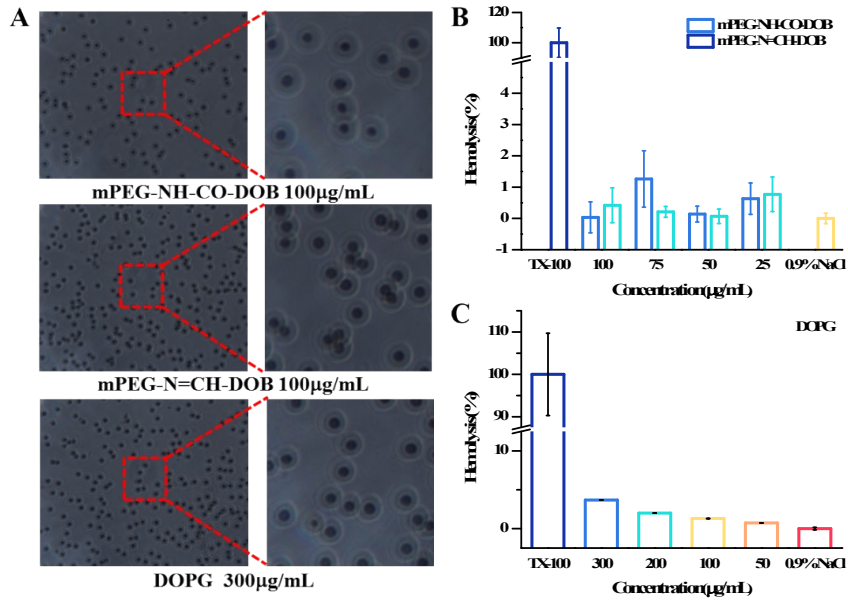

**Fig. S12.** Hemolysis test results.

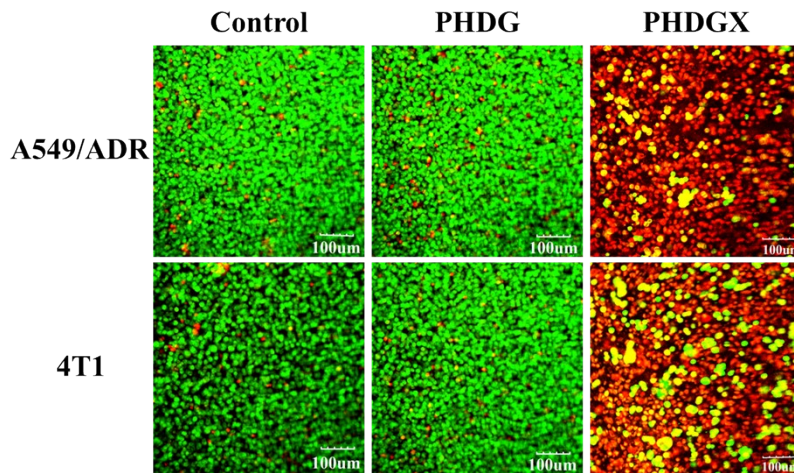

**Fig. S13.** Live-dead cell staining assay of A549/ADR with 4T1 cells.

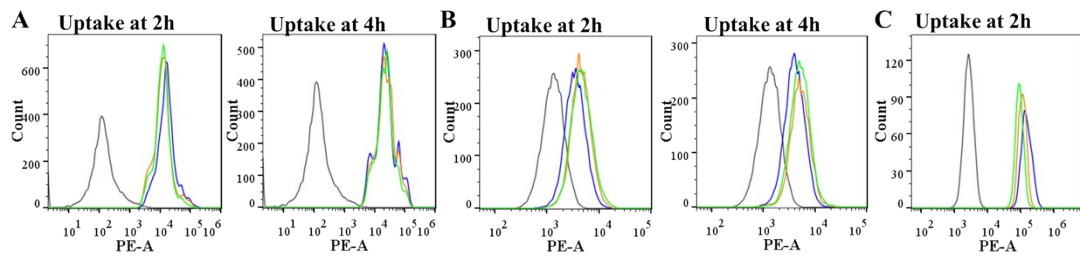

**Fig. S14.** (A) Flow cytometric analysis results of 4T1 cells on free DOX, PDG and

PHDGX. The concentration of DOX was 3  $\mu\text{g/mL}$ . (B) Flow cytometric analysis results of A549/ADR cells on free DOX, PDGX and PHDGX. The concentration of DOX was 3  $\mu\text{g/mL}$ . (C) Flow cytometric analysis results of A549/ADR cells on free DOX, PDGX and PHDGX. The concentration of DOX was 20  $\mu\text{g/mL}$ . The gray line is the negative control group. The blue line is DOX, the green line is PDGX, and the orange line is PHDGX.
